# Supplementary material
Source: PubMed Central journal article supplement (PMC3436130)
Supplement: supp_M112.365676_jbc.M112.365676-1.pdf [file supp_M112.365676_jbc.M112.365676-1.pdf]

## Supplemental Figure legend

### FIGURE S1. Expression pattern of *atg-4.1::gfp*

(A-D) The *atg-4.1::gfp* reporter functionally rescues defective degradation of SEPA-1 aggregates in *atg-4.1* mutants. SEPA-1 aggregates accumulate in late stage *atg-4.1* mutant embryos, but are almost completely absent in late stage *atg-4.1* mutant embryos carrying the *atg-4.1::gfp* transgene. (A) and (C): Nomarski images of the embryos shown in (B) and (D), respectively.

(E and F) *atg-4.1::gfp* is ubiquitously expressed in the cytoplasm in embryos. (E) Nomarski image of the embryo in (F).

(G and H) Expression of *atg-4.1::gfp* remains unchanged in *atg-4.2(tm3948)* mutant embryos. (G) Nomarski image of the embryo in (H).

(I and J) Real-time PCR results show that mRNA levels of *atg-4.2* and *atg-4.1* are not changed in *atg-4.1* (I) and *atg-4.2* mutants (J), respectively.

### FIGURE S2. Alignment of ATG-4.1 and ATG-4.2 with yeast Atg4p and human Atg4B

Clustal X (version 1.83) alignment of *Ce*ATG-4.1(NP\_493375), *Ce*ATG-4.2(NP\_502208), *Sc*Atg4p(NP\_014176), and *Hs*Atg4B(NP\_037457). The catalytic site, the regulatory loop and the mutated residues found in *atg-4.1* mutants are marked.

**FIGURE S3. ATG-4.2 does not reduce the catalytic efficiency of ATG-4.1**

(A-B) Different ratios (1:0, 1:1, and 1:5) of ATG-4.1 and ATG-4.2 in a fixed amount of total enzymes (0.0125 mg/ml) were incubated with decreasing concentrations of the substrate LGG-1-His<sub>6</sub> for 5 minutes. SDS-PAGE followed by CBB staining was used to resolve the mixture. The curves were plotted and fitted as described in Fig. 4G-J.

(C) The efficiency ( $k_{cat}/K_m$ ) of each reaction catalyzed by different ratios of enzyme mixture (ATG-4.1 to ATG-4.2) was calculated as described in Fig. 4K. The value of the reaction without ATG-4.2 was considered as the basal efficiency of ATG-4.1. The enzyme mixture exhibited a slightly increased efficiency in cleaving the substrates as expected from the same concentration of ATG-4.1 alone.

**FIGURE S4. Accumulation of SEPA-1 aggregates and LGG-1 puncta in *epg-6*, *atg-4.1*, and their double mutants**

This figure shows separate images for Fig. 6F,G,H.

(A-D) SEPA-1 aggregates and LGG-1 puncta form clusters and are largely colocalized in *epg-6* mutant.

(E-H) In *atg-4.1* mutants, SEPA-1 aggregates are small and separable from LGG-1 puncta.

(I-L) In *atg-4.1; epg-6* double mutants, SEPA-1 aggregates are small, spherical and do not colocalize with LGG-1 puncta, resembling those in *atg-4.1* mutants.

(A), (E) and (I): DAPI image of the embryo shown in the same row.

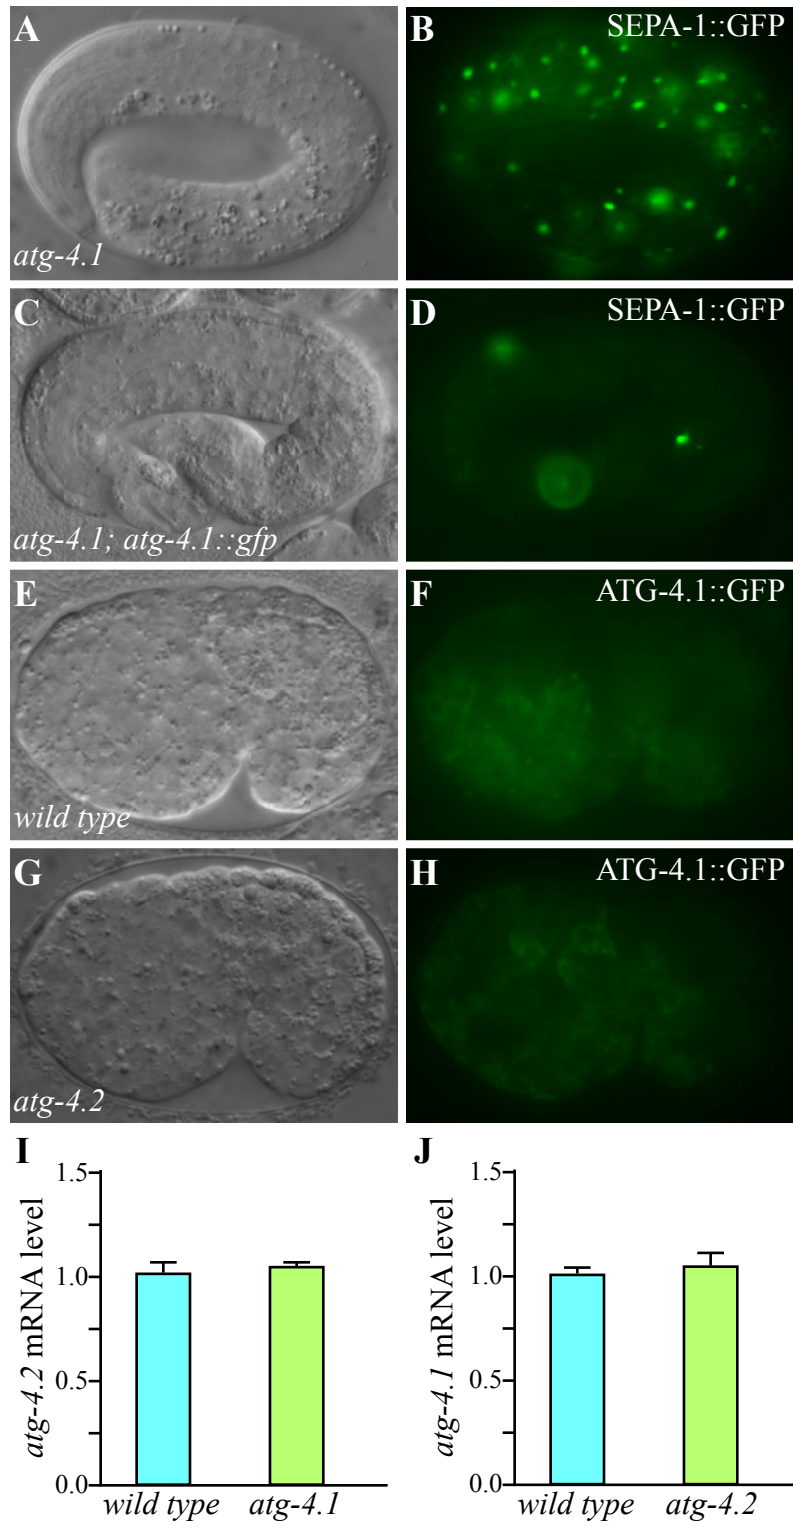

Figure S1



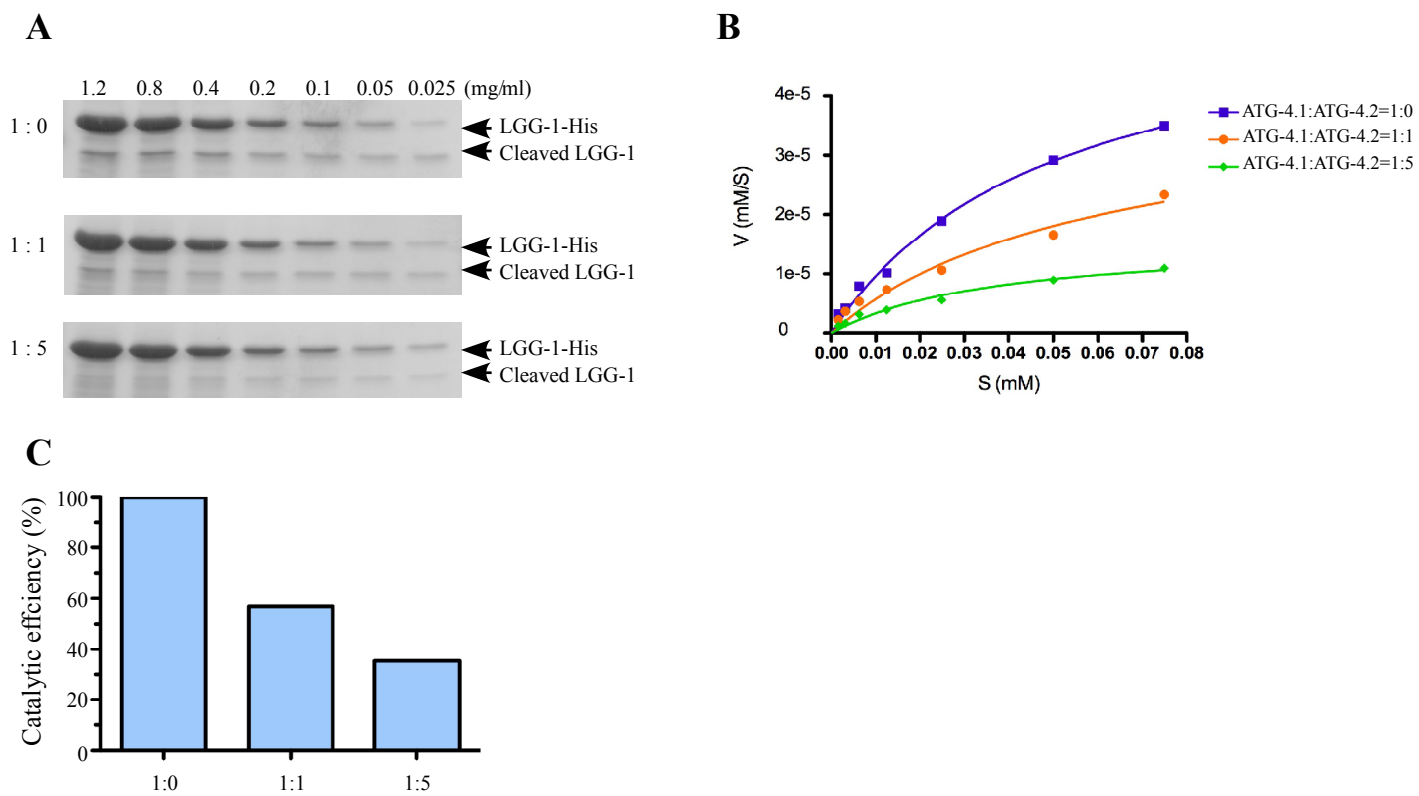

Figure S3

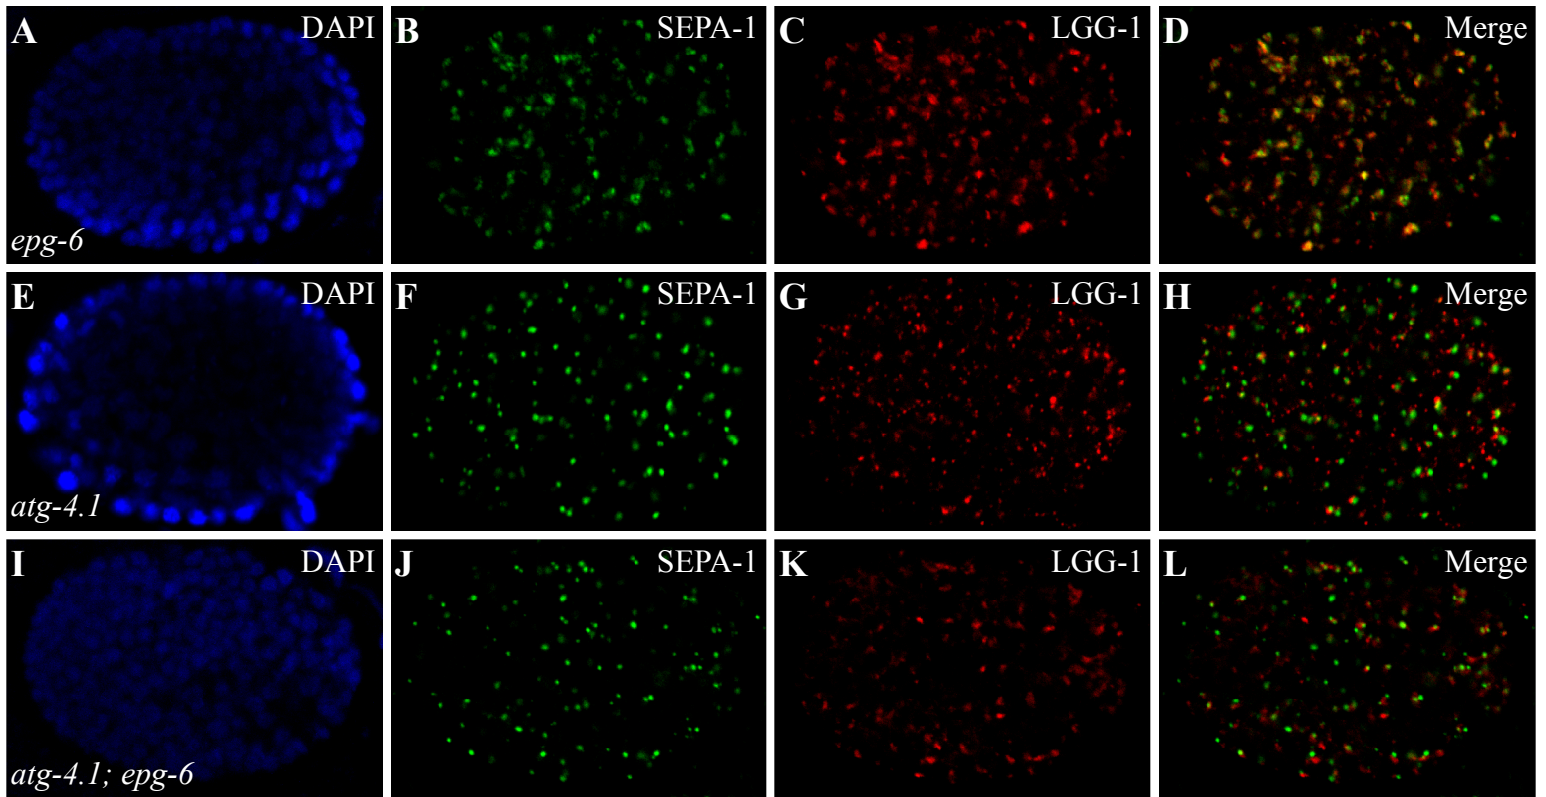

Figure S4
